# Supplementary material for: Cytoplasm-predominant Pten associates with increased region-specific brain tyrosine hydroxylase and dopamine D2 receptors in mouse model with autistic traits
Source: PubMed Central journal article supplement (PMC4647625; doi:10.1186/s13229-015-0056-6), 2015-11-17
Supplement: 13229_2015_56_MOESM1_ESM.pdf [file 13229_2015_56_MOESM1_ESM.pdf]

## Supplementary Information

### **Cytoplasm-predominant Pten associates with increased region-specific brain tyrosine hydroxylase and dopamine D2 receptors in mouse model with autistic traits Pten**

Xin He<sup>1,2</sup> Stetson Thacker<sup>1,2,3</sup> Todd Romigh<sup>1,2</sup> Qi Yu<sup>1,2</sup> Thomas W Frazier Jr<sup>1,2,3,4,5</sup> and Charis Eng<sup>1,2,3,6,7,8,9</sup>

<sup>1</sup>Genomic Medicine Institute, Cleveland Clinic, Cleveland, OH, USA <sup>2</sup>Lerner Research Institute, Cleveland Clinic, Cleveland, OH, USA <sup>3</sup>HHMI Graduate Program, Department of Molecular Medicine, Cleveland Clinic Lerner College of Medicine, Case Western Reserve University School of Medicine, Cleveland, OH, USA <sup>4</sup>Center for Autism, Pediatrics Institute, Cleveland Clinic, Cleveland, OH, USA <sup>5</sup>Department of Pediatrics, Case Western Reserve University School of Medicine, Cleveland, OH, USA <sup>6</sup>Taussig Cancer Institute, Cleveland Clinic, Cleveland, OH, USA <sup>7</sup>Stanley Shalom Zielony Institute of Nursing Excellence, Cleveland Clinic, Cleveland, OH, USA <sup>8</sup>Department of Genetics and Genome Sciences, Case Western Reserve University School of Medicine, Cleveland, OH, USA <sup>9</sup>CASE Comprehensive Cancer Center, Case Western Reserve University School of Medicine, Cleveland, OH, USA

## Supplementary Figures

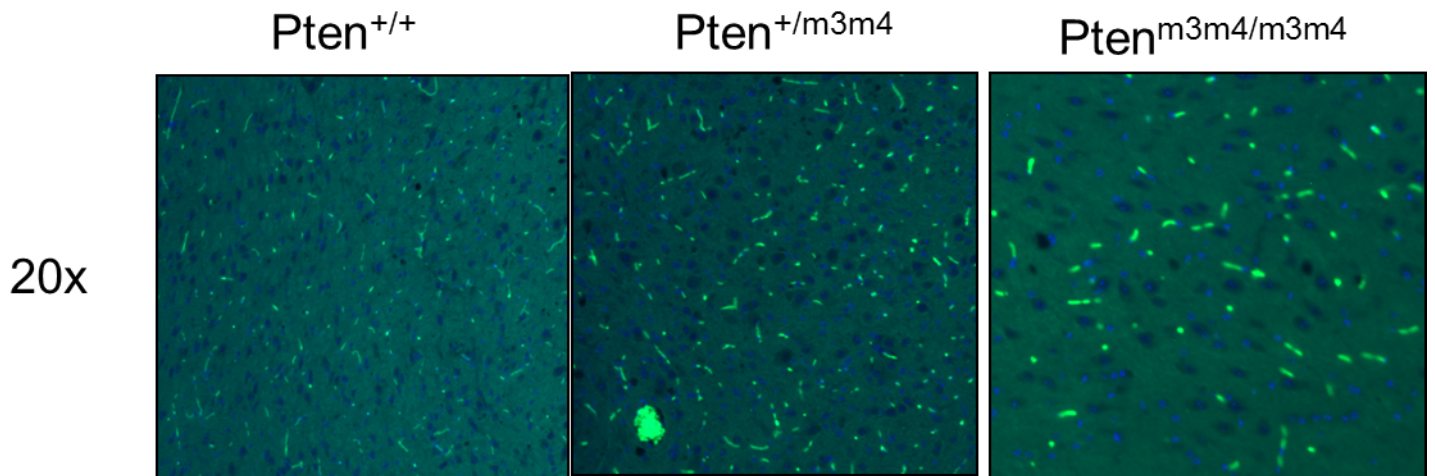

**Supplementary Figure 1A.** Immunofluorescent staining of frontal sections of mouse brains indicates increased D2R expression and larger nuclei in Pten<sup>m3m4/m3m4</sup> mice.

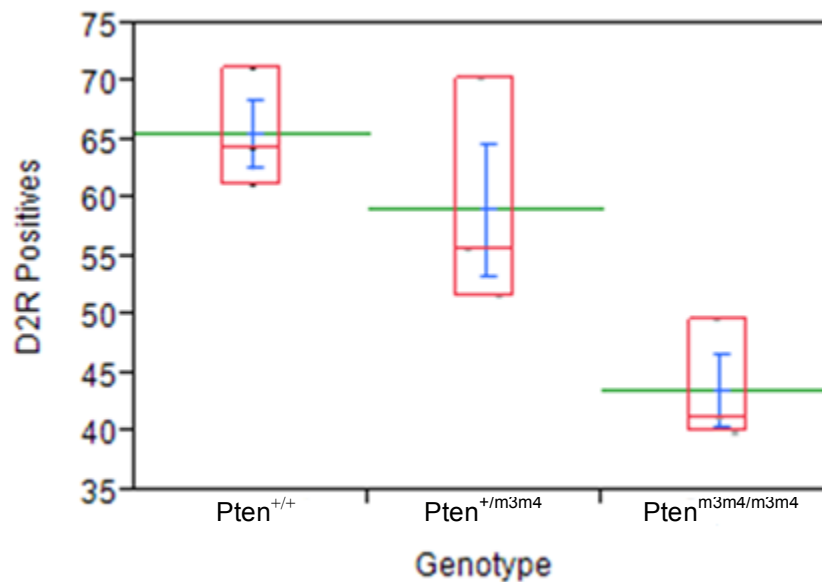

**Supplementary Figure 1B.** Quantification of D2R immunofluorescence in triplicates of each genotype's frontal section of mouse brains indicates the mutant D2R immunofluorescence is significantly increased in comparison to the immunofluorescence in the wild-type ( $P = 0.021$ ).

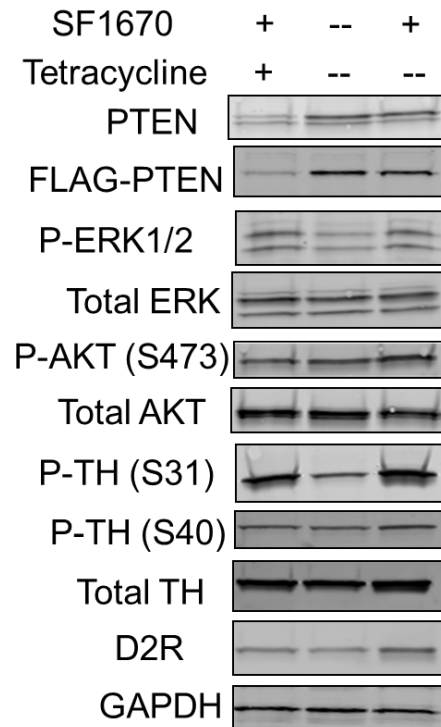

**Supplementary Figure 2.** Inhibition of ectopic and endogenous PTEN function with SF1670 leads to an increase in phosphorylation of TH in PC12 cells. PTEN inhibitor is applied in lanes 1 and 3 (+) but off (-) in lane 2. Tetracycline is on (+) in lane 1 turning off ectopic expression of wildtype PTEN in PC12 cells that has endogenous wildtype PTEN. Tet-off (-) turns on ectopic expression of wildtype human PTEN (lanes 2 and 3).

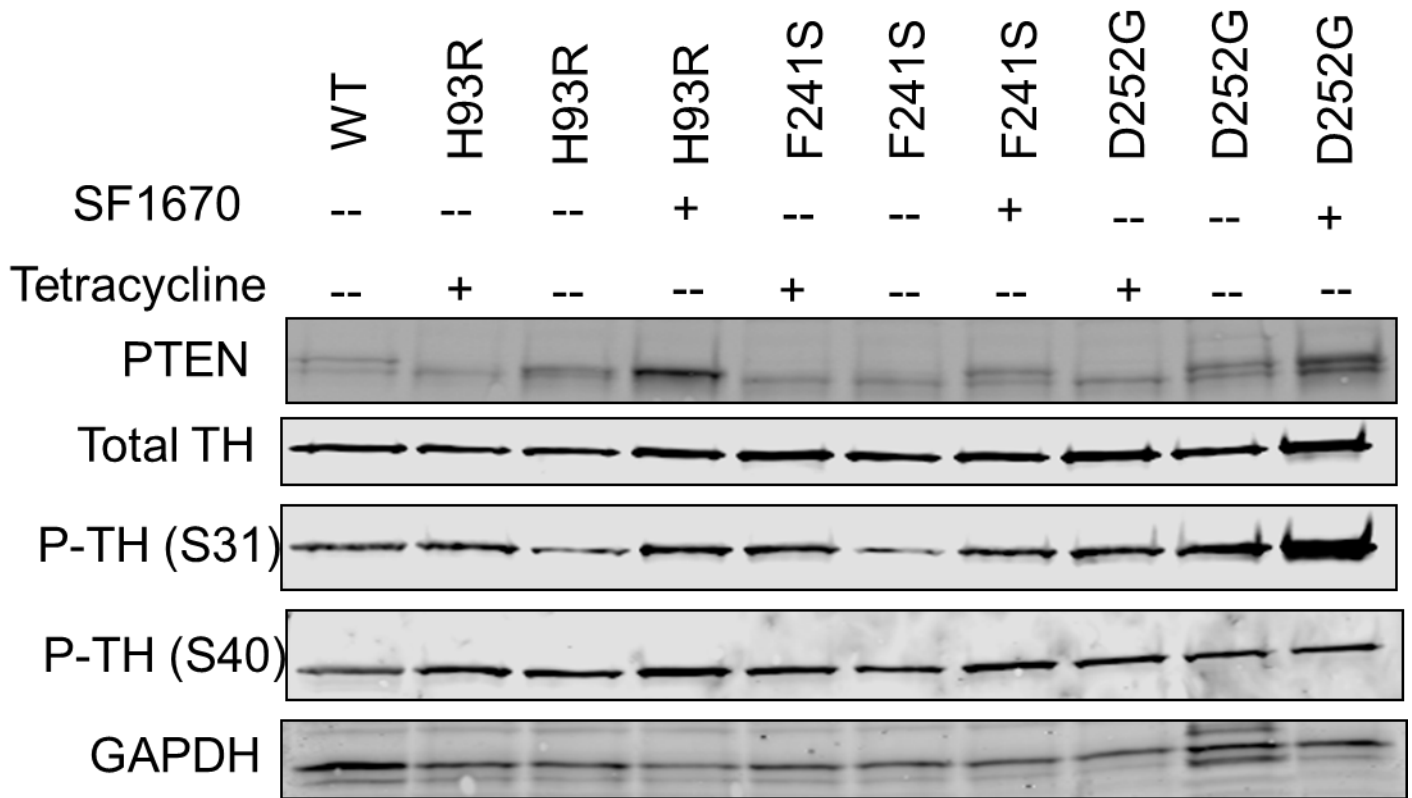

**Supplementary Figure 3.** Overexpression of naturally occurring ASD-associated germline *PTEN* mutations are unable to completely suppress TH phosphorylation. When tetracycline is applied (Tet+), ectopic *PTEN* expression is turned off. When tetracycline is removed (Tet-off; -), ectopic expression of *PTEN* occurs.
